# Supplementary material
Source: publisher figshare collection journal article supplement (https://gsajournals.figshare.com/articles/dataset/_/9835208)
Supplement: Supplementary file [file 1]

| # Name           | Version      | Build           | Channel  |
|------------------|--------------|-----------------|----------|
| asn1crypto       | 0.24.0       | py27_0          |          |
| avro             | 1.8.0        | py27_0          | bioconda |
| bcftools         | 1.9          | h4da6232_0      | bioconda |
| bedtools         | 2.27.1       | he941832_2      | bioconda |
| blas             | 1.0          | mk1             |          |
| blasr            | 5.3.2        | hac9d22c_3      | bioconda |
| blasr-libcpp     | 5.3.1        | hac9d22c_2      | bioconda |
| bwa              | 0.7.17       | ha92aebf_3      | bioconda |
| bzip2            | 1.0.6        | h14c3975_5      |          |
| ca-certificates  | 2018.03.07   | 0               |          |
| certifi          | 2018.8.24    | py27_1          |          |
| cffi             | 1.11.5       | py27he75722e_1  |          |
| chardet          | 3.0.4        | py27_1          |          |
| cryptography     | 2.3.1        | py27hc365091_0  |          |
| curl             | 7.61.0       | h84994c4_0      |          |
| cython           | 0.28.5       | py27hf484d3e_0  |          |
| decorator        | 4.3.0        | py27_0          |          |
| enum34           | 1.1.6        | py27_1          |          |
| falcon-kit       | 1.2.3        | pypi_0          | pypi     |
| falcon-phase     | 1.0.0        | pypi_0          | pypi     |
| falcon-unzip     | 1.1.3        | pypi_0          | pypi     |
| future           | 0.16.0       | py27_2          |          |
| genomicconsensus | 2.3.2        | py27_1          | bioconda |
| h5py             | 2.8.0        | py27h989c5e5_3  |          |
| hdf5             | 1.10.2       | hba1933b_1      |          |
| htslib           | 1.7          | 0               | bioconda |
| idna             | 2.7          | py27_0          |          |
| intel-openmp     | 2019.0       | 118             |          |
| ipaddress        | 1.0.22       | py27_0          |          |
| iso8601          | 0.1.12       | py27_1          |          |
| libcurl          | 7.61.0       | h1ad7b7a_0      |          |
| libdeflate       | 1.0          | h470a237_0      | bioconda |
| libedit          | 3.1.20170329 | h6b74fdf_2      |          |
| libffi           | 3.2.1        | hd88cf55_4      |          |
| libgcc           | 7.2.0        | h69d50b8_2      |          |
| libgcc-ng        | 8.2.0        | hdf63c60_1      |          |
| libgfortran-ng   | 7.3.0        | hdf63c60_0      |          |
| libssh2          | 1.8.0        | h9cfc8f7_4      |          |
| libstdcxx-ng     | 8.2.0        | hdf63c60_1      |          |
| linecache2       | 1.0.0        | py27_0          |          |
| minimap2         | 2.12         | ha92aebf_0      | bioconda |
| mk1              | 2019.0       | 118             |          |
| mk1_fft          | 1.0.4        | py27h4414c95_1  |          |
| mk1_random       | 1.0.1        | py27h4414c95_1  |          |
| mummer4          | 4.0.0beta2   | pl526hfc679d8_3 | bioconda |
| ncurses          | 6.1          | hf484d3e_0      |          |
| networkx         | 2.1          | py27_0          |          |
| nim-falcon       | 0.0.0        | 0               | bioconda |
| numpy            | 1.15.1       | py27h1d66e8a_0  |          |
| numpy-base       | 1.15.1       | py27h81de0dd_0  |          |
| openssl          | 1.0.2p       | h14c3975_0      |          |
| pb-assembly      | 0.0.1        | py27_0          | bioconda |
| pb-dazzler       | 0.0.0        | h470a237_0      | bioconda |

|                         |        |                |          |
|-------------------------|--------|----------------|----------|
| pb-falcon               | 0.2.3  | py27ha92aebf_0 | bioconda |
| pbalign                 | 0.3.1  | py27_0         | bioconda |
| pbbam                   | 0.18.0 | h1310cd9_1     | bioconda |
| pbcommand               | 1.1.1  | py27h24bf2e0_1 | bioconda |
| pbcore                  | 1.5.1  | py27_1         | bioconda |
| perl                    | 5.26.2 | h14c3975_0     |          |
| pip                     | 10.0.1 | py27_0         |          |
| pycparser               | 2.18   | py27_1         |          |
| pyopenssl               | 18.0.0 | py27_0         |          |
| pysam                   | 0.14.1 | py27hae42fb6_1 | bioconda |
| pysocks                 | 1.6.8  | py27_0         |          |
| python                  | 2.7.15 | h1571d57_0     |          |
| python-consensuscore    | 1.1.1  | py27h02d93b8_1 | bioconda |
| python-consensuscore2   | 3.1.0  | py27_1         | bioconda |
| python-edlib            | 1.2.3  | py27h470a237_1 | bioconda |
| python-intervaltree     | 2.1.0  | py_0           | bioconda |
| python-msgpack          | 0.5.6  | py27h470a237_0 | bioconda |
| python-sortedcontainers | 2.0.4  | py_0           | bioconda |
| pytz                    | 2018.5 | py27_0         |          |
| readline                | 7.0    | h7b6447c_5     |          |
| requests                | 2.19.1 | py27_0         |          |
| samtools                | 1.9    | h8ee4bcc_1     | bioconda |
| setuptools              | 40.2.0 | py27_0         |          |
| six                     | 1.11.0 | py27_1         |          |
| sqlite                  | 3.24.0 | h84994c4_0     |          |
| tk                      | 8.6.8  | hbc83047_0     |          |
| traceback2              | 1.4.0  | py27_0         |          |
| unittest2               | 1.1.0  | py27_0         |          |
| urllib3                 | 1.23   | py27_0         |          |
| wheel                   | 0.31.1 | py27_0         |          |
| xz                      | 5.2.4  | h14c3975_4     |          |
| zlib                    | 1.2.11 | ha838bed_2     |          |

Software versions in the pb-assembly conda environment used for assembly, phasing, and polishing.
